# Supplementary material for: Novel data-driven subtypes and stages of brain atrophy in the ALS-FTD spectrum
Source: PubMed Central journal article supplement (PMC10441467; doi:10.21203/rs.3.rs-3183113/v1), 2023-08-10
Supplement: NIHPPrs3183113v1-supplement-1.pdf [file NIHPPrs3183113v1-supplement-1.pdf]

This is a list of supplementary files associated with this preprint. Click to download.

- [SupplementaryMaterial.docx](#)
